# Supplementary material
Source: PubMed Central journal article supplement (PMC3586605)
Supplement: NIHMS414200-supplement-1_si_001.pdf [file NIHMS414200-supplement-1_si_001.pdf]

# Gadolinium MRI Contrast Agents Based on Triazine Dendrimers: Relaxivity and In Vivo Pharmacokinetics

*Jongdoo Lim,<sup>†</sup> Baris Turkbey,<sup>‡</sup> Marcelino Bernardo,<sup>§</sup> L. Henry Bryant Jr.,<sup>#</sup>  
Matteo Garzoni,<sup>¶</sup> Giovanni M. Pavan,<sup>¶</sup> Peter L. Choyke,<sup>‡</sup> Eric E. Simanek,<sup>†</sup> and  
Hisataka Kobayashi<sup>‡,\*</sup>*

<sup>†</sup>Department of Chemistry, Texas Christian University, Fort Worth, TX 76129

<sup>‡</sup>Molecular Imaging Program, Center for Cancer Research, National Cancer Institute,  
National Institutes of Health, Bethesda, Maryland 20892

<sup>§</sup>SAIC-Frederick, Inc., NCI-Frederick, National Cancer Institute, National Institutes of  
Health, Frederick, Maryland 21702

<sup>#</sup>Laboratory of Diagnostic Radiology Research, Radiology & Imaging Sciences, Warren  
Magnuson Clinical Center, National Institutes of Health, Bethesda, Maryland 20892

<sup>¶</sup>Department of Innovative Technologies, University of Applied Science of Southern  
Switzerland, Galleria 2 Manno, SZ

## Table of Contents

|                            | page |
|----------------------------|------|
| General Procedures .....   | S2   |
| Synthetic Procedures ..... | S2   |
| Spectra.....               | S7   |

## General procedures

G3 and G5 dendrimers were prepared using methods previously described.<sup>s1</sup> p-NH<sub>2</sub>-Bn-DOTA-tetra(t-Bu ester) and p-NH<sub>2</sub>-Bn-DTPA-penta(t-Bu ester) were purchased from Macrocyclics. All other chemicals were purchased from Aldrich and Acros. All solvents were ACS grade and used without further purification. Diafiltration purification was performed with Amicon stirred ultrafiltration cell equipment (Model 8050, PLCC membrane, Millipore Corp.) at 35 psi of N<sub>2</sub>. NMR spectra were recorded on a Varian Mercury 300 MHz or Inova 500 MHz spectrometer in CDCl<sub>3</sub>, or CDCl<sub>3</sub>:MeOH-d<sub>4</sub> (10:1). All mass spectral analyses were carried out by the Laboratory for Biological Mass Spectrometry at Texas A&M.

## Synthetic Procedures

**Compound 1.** A solution of **6** (40 mg, 1.44 μmol), 1-[2-(2-hydroxyethoxy)ethyl]piperazine (60 mg, 0.344 mmol), and DIPEA (0.2 mL, 1.14 mmol) in THF (15 mL) was stirred for 24 h at room temperature. After the temperature was raised to 50 °C, the reaction solution was stirred for an additional 24 h and evaporated under vacuum. The residue was dissolved with dichloromethane, washed with brine, dried over MgSO<sub>4</sub>, filtered, and evaporated under vacuum. The resulting product was dissolved in a solution of trifluoroacetic acid (4 mL), dichloromethane (1 mL), and methanol (1 mL). The solution was stirred for 48 h at room temperature and evaporated under vacuum. The crude product was dissolved in dichloromethane and methanol and precipitated by adding hexanes. The precipitation was repeated twice more to afford **1** (37 mg, quantitative) as a white solid. MS (MALDI-TOF) calcd for C<sub>1152</sub>H<sub>1794</sub>N<sub>396</sub>O<sub>285</sub> 25735.81, found 25500 (M+H)<sup>+</sup>.

**Compound 2.** A solution of **7** (0.19 g, 1.68 μmol), 1-[2-(2-hydroxyethoxy)ethyl]piperazine (0.80 g, 4.59 mmol), and DIPEA (0.2 mL, 1.14 mmol) in THF (10 mL) was stirred for 24 h at room temperature. After the temperature was raised to 50 °C, the reaction solution was stirred for an additional 24 h and evaporated under

---

<sup>s1</sup> Lim, J.; Mintzer, M. A.; Perez, L. M.; Simanek, E. E. Synthesis of odd generation triazine dendrimers using a divergent, macromonomer approach. *Org. Lett.* **2010**, *12*, 1148-1151.

vacuum. The residue was dissolved with dichloromethane, washed with brine, dried over MgSO<sub>4</sub>, filtered, and evaporated under vacuum. The resulting product was dissolved in a solution of trifluoroacetic acid (6 mL), dichloromethane (1.5 mL), and methanol (1.5 mL). The solution was stirred for 48 h at room temperature and evaporated under vacuum. The crude product was dissolved in dichloromethane and methanol and precipitated by adding hexanes. The precipitation was repeated twice more to afford **2** (150 mg, 85%) as a white solid. MS (MALDI-TOF) calcd for C<sub>4680</sub>H<sub>7290</sub>N<sub>1620</sub>O<sub>1149</sub> 104570.18, found 105700 (M+H)<sup>+</sup>.

**Compound 3.** A solution of **9** (66 mg, 2.28 μmol), 1-[2-(2-hydroxyethoxy)ethyl]piperazine (0.10 g, 0.574 mmol), and DIPEA (0.2 mL, 1.14 mmol) in THF (15 mL) was stirred for 24 h at room temperature. After the temperature was raised to 50 °C, the reaction solution was stirred for an additional 24 h and evaporated under vacuum. The residue was dissolved with dichloromethane, washed with brine, dried over MgSO<sub>4</sub>, filtered, and evaporated under vacuum. The resulting product was dissolved in a solution of trifluoroacetic acid (4 mL), dichloromethane (1 mL), and methanol (1 mL). The solution was stirred for 48 h at room temperature and evaporated under vacuum. The crude product was dissolved in dichloromethane and methanol and precipitated by adding hexanes. The precipitation was repeated twice more to afford **1** (58 mg, quantitative) as a white solid. MS (MALDI-TOF) calcd for C<sub>1104</sub>H<sub>1674</sub>N<sub>372</sub>O<sub>333</sub> 25470.55, found 24800 (M+H)<sup>+</sup>.

**Compound 4.** A solution of **10** (193 mg, 1.65 μmol), 1-[2-(2-hydroxyethoxy)ethyl]piperazine (0.80 g, 4.59 mmol), and DIPEA (0.2 mL, 1.14 mmol) in THF (10 mL) was stirred for 24 h at room temperature. After the temperature was raised to 50 °C, the reaction solution was stirred for an additional 24 h and evaporated under vacuum. The residue was dissolved with dichloromethane, washed with brine, dried over MgSO<sub>4</sub>, filtered, and evaporated under vacuum. The resulting product was dissolved in a solution of trifluoroacetic acid (8 mL), dichloromethane (2 mL), and methanol (2 mL). The solution was stirred for 48 h at room temperature and evaporated under vacuum. The crude product was dissolved in dichloromethane and methanol and precipitated by adding

hexanes. The precipitation was repeated twice more to afford **4** (170 mg, quantitative) as a light yellow solid. MS (MALDI-TOF) calcd for  $C_{4488}H_{6810}N_{1524}O_{1341}$  103509.15, found 104700 (M+H)<sup>+</sup>.

**Compound 5.** Cyanuric chloride (51 mg, 0.277 mmol) was added to an ice-bath cooled solution of p-NH<sub>2</sub>-Bn-DOTA-tetra(t-Bu ester) (0.20 g, 0.272 mmol) and DIPEA (0.20 mL, 1.14 mmol) in THF (20 mL). The solution was stirred for 2 h at 0 °C and then concentrated under vacuum. The residue was dissolved in dichloromethane, washed with brine, dried over MgSO<sub>4</sub>, filtered, and evaporated under vacuum. The crude product was purified by silica gel chromatography (DCM:MeOH = 8:1) to give **5** (0.21 g, 88% ) as a white solid. <sup>1</sup>H NMR (300 MHz, CDCl<sub>3</sub>) δ 7.64 (d, J = 8.1 Hz, 2H), 6.93 (t, J = 9.2 Hz, 2H), 3.35-1.75 (m, 25H), 1.34 (m, 36H); <sup>13</sup>C NMR (75 MHz, CDCl<sub>3</sub>) δ 172.9, 172.8, 172.7, 172.6 (two lines), 172.5, 170.0, 169.3, 168.7, 167.2, 163.6, 135.5, 135.4, 135.2, 134.8, 128.8, 128.7, 122.2, 122.0, 82.2, 82.1 (two lines), 82.0, 81.9, 81.8, 60.8, 56.3, 55.9, 55.5, 55.3, 52.6, 52.4, 52.3, 52.0, 50.6, 48.6, 48.5, 48.0, 47.8, 42.5, 31.6, 31.0, 27.7; MS (MALDI-TOF) calcd for C<sub>42</sub>H<sub>66</sub>Cl<sub>2</sub>N<sub>8</sub>O<sub>8</sub> 880.4381, found 903.4241 (M+Na)<sup>+</sup>.

**Compound 6.** A solution of **G3** (40 mg, 5.31 μmol) in THF (1 mL) and H<sub>2</sub>O (0.3 mL) was slowly added to a solution of **5** (0.16 g, 0.181 mmol) and DIPEA (0.1 mL, 0.57 mmol) in THF (2 mL) at 0 °C. The solution was stirred for 48 h at room temperature and evaporated under vacuum. The residue was dissolved with dichloromethane, washed with brine, dried over MgSO<sub>4</sub>, filtered, and evaporated under vacuum. The crude product was purified by precipitation from ethyl acetate to give **6** (0.13 g, 88%) as a white solid. <sup>1</sup>H NMR (500 MHz, CDCl<sub>3</sub>) δ 7.52 (br, 48H), 7.08 (br, 48H), 3.81-1.80 (m, 1140H), 1.42 (m, 864H); <sup>13</sup>C NMR (75 MHz, CDCl<sub>3</sub>) δ 173.2, 173.0, 172.9, 172.8, 168.9, 167.1, 166.3, 165.2, 164.6, 163.8, 136.7, 134.2, 129.3, 120.7, 82.4, 82.2 (two lines), 82.1, 82.0, 70.6, 70.3, 69.4, 61.4, 55.8, 52.7, 50.9, 48.1, 43.0, 38.3, 31.7, 31.1, 29.7, 28.0; MS (MALDI-TOF) calcd for C<sub>1344</sub>H<sub>2154</sub>Cl<sub>24</sub>N<sub>348</sub>O<sub>237</sub> 27801.97, found 27459.14 (M+H)<sup>+</sup>.

**Compound 7.** A solution of **G5** (60 mg, 1.89  $\mu\text{mol}$ ) in THF (2 mL) and H<sub>2</sub>O (0.5 mL) was slowly added to a solution of **5** (0.28 g, 0.317 mmol) and DIPEA (0.2 mL, 1.14 mmol) in THF (3 mL) at 0 °C. The solution was stirred for 48 h at room temperature and evaporated under vacuum. The residue was dissolved with dichloromethane, washed with brine, dried over MgSO<sub>4</sub>, filtered, and evaporated under vacuum. The crude product was purified by precipitation with hexanes from ethyl acetate to give **7** (0.195 g, 91%) as a white solid. <sup>1</sup>H NMR (300 MHz, CDCl<sub>3</sub>)  $\delta$  7.55 (d, J = 7.2 Hz, 192H), 7.07 (br, 192H), 3.81-1.81 (m, 4668H), 1.42 (m, 3456H); <sup>13</sup>C NMR (75 MHz, CDCl<sub>3</sub>/MeOH-d<sub>4</sub>)  $\delta$  172.9, 172.7 (two lines), 172.6, 172.5, 172.4, 168.6, 167.1, 166.0, 164.9, 164.7, 164.2, 136.5, 133.5, 128.9, 120.6, 82.2, 82.1, 82.0, 81.9, 70.3, 69.9, 69.0, 61.0, 55.3, 52.2, 50.6, 48.5, 43.3, 42.3, 37.7, 31.4, 30.9, 29.3, 27.6; MS (MALDI-TOF) calcd for C<sub>5448</sub>H<sub>8730</sub>Cl<sub>96</sub>N<sub>1428</sub>O<sub>957</sub> 112834.85, not found.

**Compound 8.** Cyanuric chloride (48 mg, 0.260 mmol) was added to an ice-bath cooled solution of p-NH<sub>2</sub>-Bn-DTPA-penta(t-Bu ester) (0.20 g, 0.257 mmol) and DIPEA (0.20 mL, 1.14 mmol) in THF (20 mL). The solution was stirred for 2 h at 0 °C and then concentrated under vacuum. The residue was dissolved in dichloromethane, washed with brine, dried over MgSO<sub>4</sub>, filtered, and evaporated under vacuum. The crude product was purified by silica gel chromatography (EtOAc:Hex = 2:3) to give **8** (0.21 g, 88% ) as a sticky clear oil. <sup>1</sup>H NMR (300 MHz, CDCl<sub>3</sub>)  $\delta$  7.41 (d, J = 8.4 Hz, 2H), 7.25 (d, J = 8.4 Hz, 2H), 3.43-3.38 (m, 10 H), 3.15-2.50 (m, 9H), 1.40 (m, 45H); <sup>13</sup>C NMR (75 MHz, CDCl<sub>3</sub>)  $\delta$  171.4, 171.2, 170.8, 170.0, 164.0, 138.4, 133.7, 130.1, 121.4, 80.9, 80.7, 63.0, 56.2, 56.0, 55.9, 53.5, 53.0, 52.4, 36.7, 28.2 (two lines); MS (MALDI-TOF) calcd for C<sub>44</sub>H<sub>69</sub>Cl<sub>2</sub>N<sub>7</sub>O<sub>10</sub> 925.4483, found 926.5064 (M+H)<sup>+</sup>.

**Compound 9.** A solution of **G3** (25 mg, 3.32  $\mu\text{mol}$ ) in THF (1 mL) and H<sub>2</sub>O (0.3 mL) was slowly added to a solution of **8** (0.10 g, 0.108 mmol) and DIPEA (0.1 mL, 0.57 mmol) in THF (2 mL) at 0 °C. The solution was stirred for 48 h at room temperature and evaporated under vacuum. The residue was dissolved with dichloromethane, washed with brine, dried over MgSO<sub>4</sub>, filtered, and evaporated under vacuum. The crude product was purified by silica gel chromatography (from EtOAc:Hex = 2:1 to EtOAc:MeOH:H<sub>2</sub>O =

7:2:1) to give **9** (79 mg, 82%) as a white solid.  $^1\text{H}$  NMR (300 MHz,  $\text{CDCl}_3$ )  $\delta$  7.39 (d,  $J = 8.1$  Hz, 48H), 7.19 (d,  $J = 7.8$  Hz, 48H), 3.80-2.40 (m, 936H), 1.82 (br, 60H), 1.39 (m, 1080H);  $^{13}\text{C}$  NMR (75 MHz,  $\text{CDCl}_3$ )  $\delta$  171.4, 171.2, 170.7, 169.1, 166.3, 165.3, 164.6, 163.7, 136.3, 135.6, 129.8, 120.2, 80.8, 80.6, 70.7, 70.3, 69.1, 63.0, 56.0, 55.8, 53.6, 53.0, 52.5, 43.6, 42.8, 38.2, 36.7, 29.7, 28.2; MS (MALDI-TOF) calcd for  $\text{C}_{1392}\text{H}_{2226}\text{Cl}_{24}\text{N}_{324}\text{O}_{285}$  28882.22, found 29324.78 ( $\text{M}+\text{H}$ ) $^+$ .

**Compound 10.** A solution of **G5** (60 mg, 1.89  $\mu\text{mol}$ ) in THF (2 mL) and  $\text{H}_2\text{O}$  (0.5 mL) was slowly added to a solution of **8** (0.30 g, 0.324 mmol) and DIPEA (0.2 mL, 1.14 mmol) in THF (3 mL) at 0  $^\circ\text{C}$ . The solution was stirred for 48 h at room temperature and evaporated under vacuum. The residue was dissolved with dichloromethane, washed with brine, dried over  $\text{MgSO}_4$ , filtered, and evaporated under vacuum. The crude product was purified by precipitation with hexanes from ethyl acetate to give **10** (0.20 g, 90%) as a white solid.  $^1\text{H}$  NMR (500 MHz,  $\text{CDCl}_3$ )  $\delta$  7.37 (d,  $J = 7.5$  Hz, 192H), 7.17 (d,  $J = 7.5$  Hz, 192H), 3.81-2.45 (m, 3840H), 1.80 (br m, 252H), 1.39 (m, 4320H);  $^{13}\text{C}$  NMR (125 MHz,  $\text{CDCl}_3$ )  $\delta$  171.4, 171.2, 170.7, 169.1, 166.3, 165.3, 164.6, 163.6, 136.2, 135.6, 129.7, 120.2, 80.8, 80.5, 70.6, 70.2, 69.3, 62.9, 56.0, 55.7, 53.5, 52.9, 52.4, 43.6, 42.9, 42.7, 38.2, 36.6, 29.6, 28.3, 28.2, 28.1, 28.0 (two lines); MS (MALDI-TOF) calcd for  $\text{C}_{5640}\text{H}_{9018}\text{Cl}_{96}\text{N}_{1332}\text{O}_{1149}$  117155.83, found 117277.83 ( $\text{M}+\text{H}$ ) $^+$ .

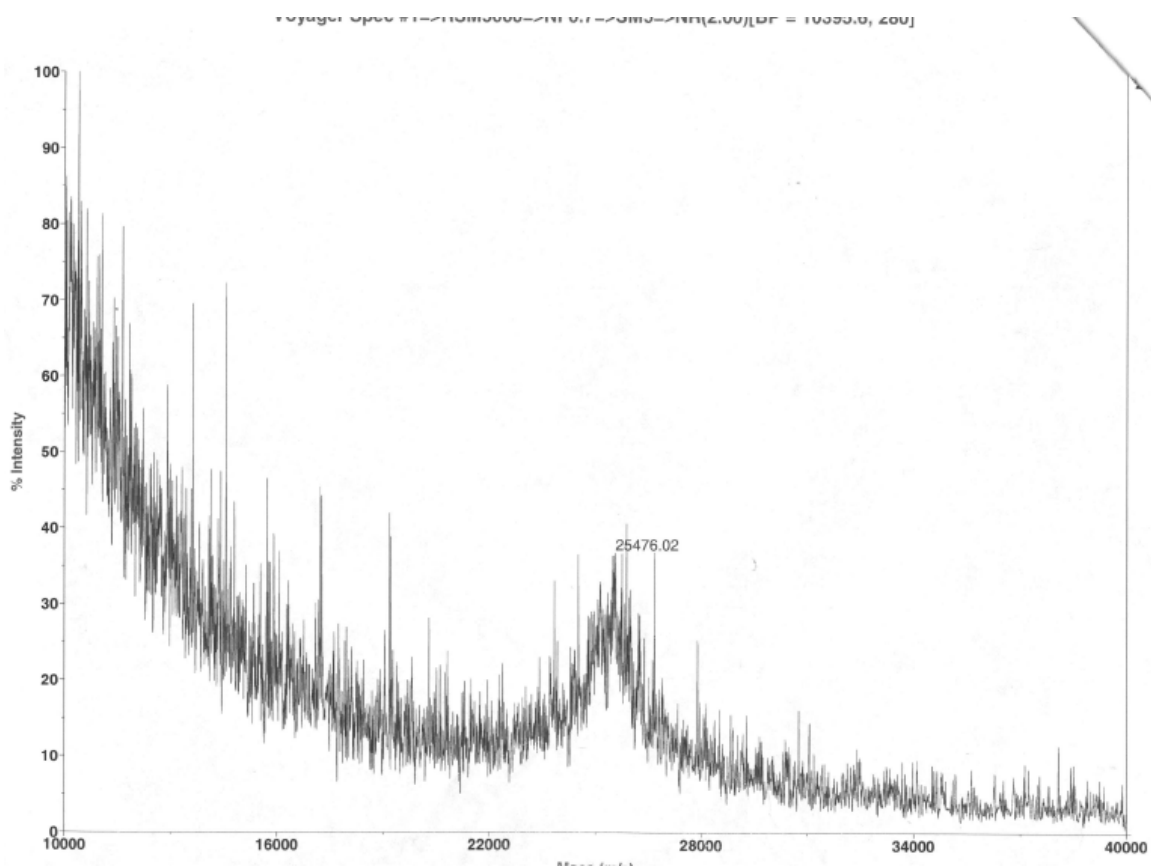

**Figure S1.** MALDI-TOF mass spectrum of compound **1**.

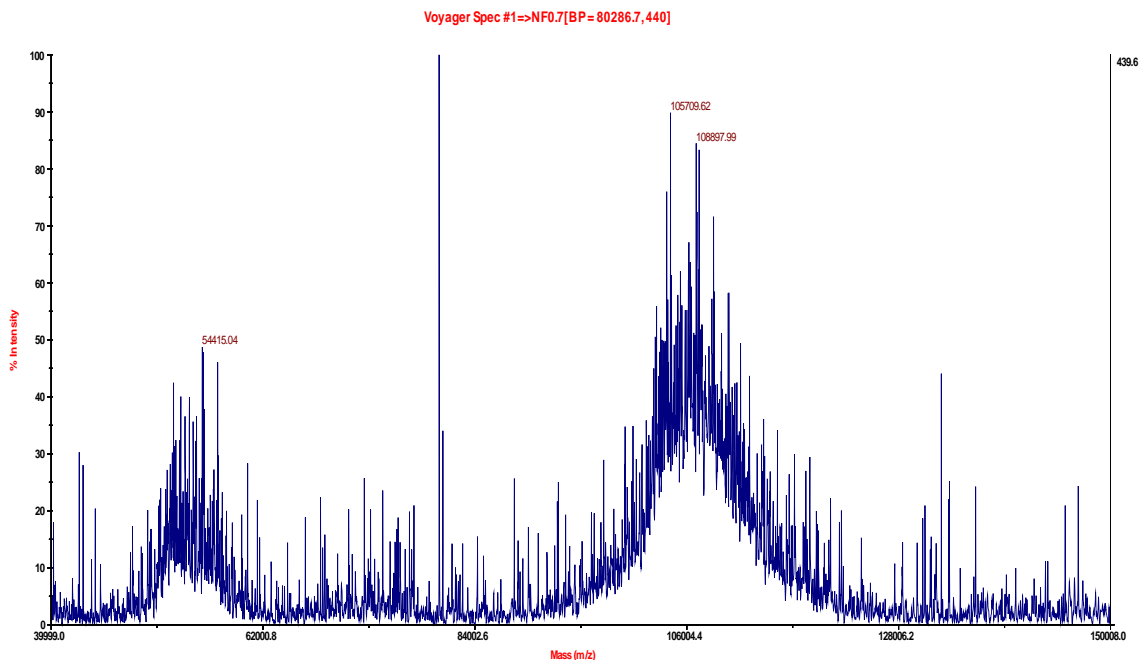

**Figure S2.** MALDI-TOF mass spectrum of compound **2**.



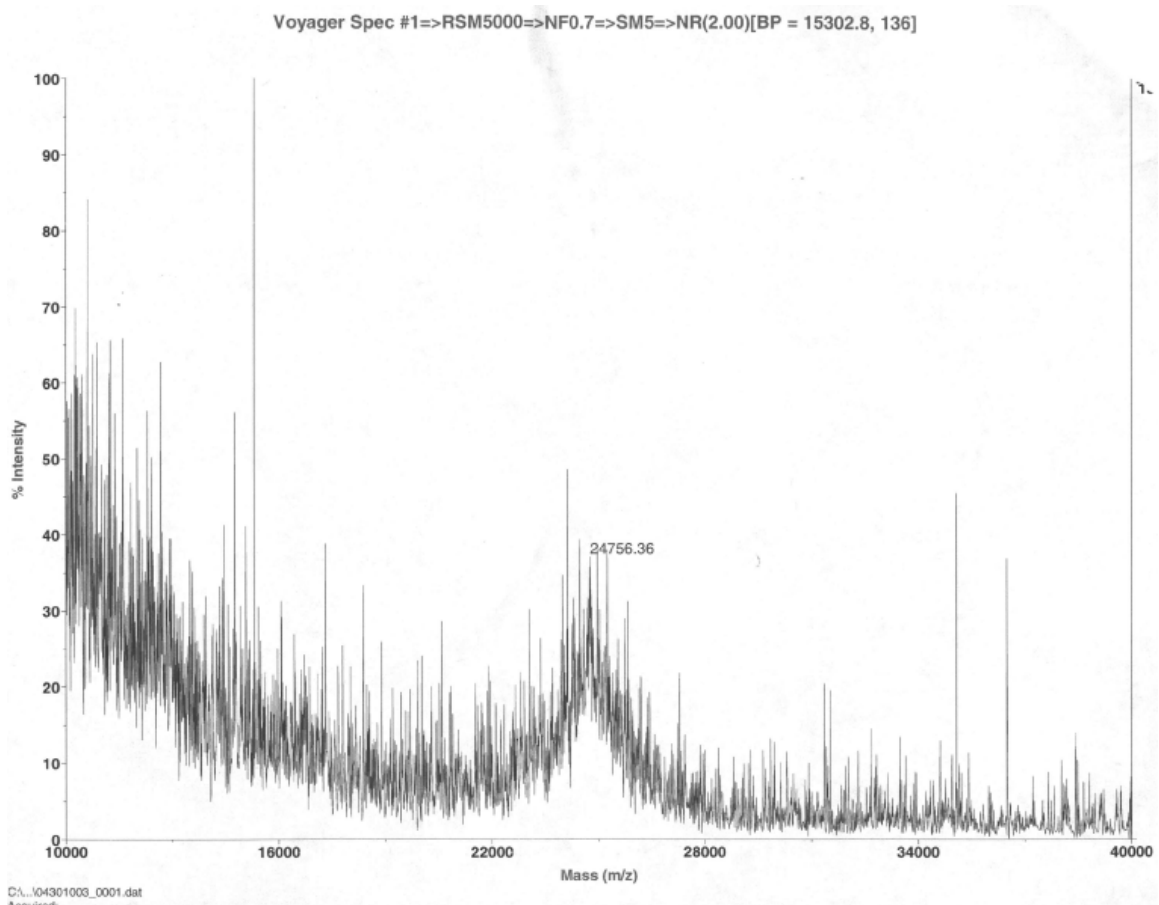

**Figure S3.** MALDI-TOF mass spectrum of compound **3**.

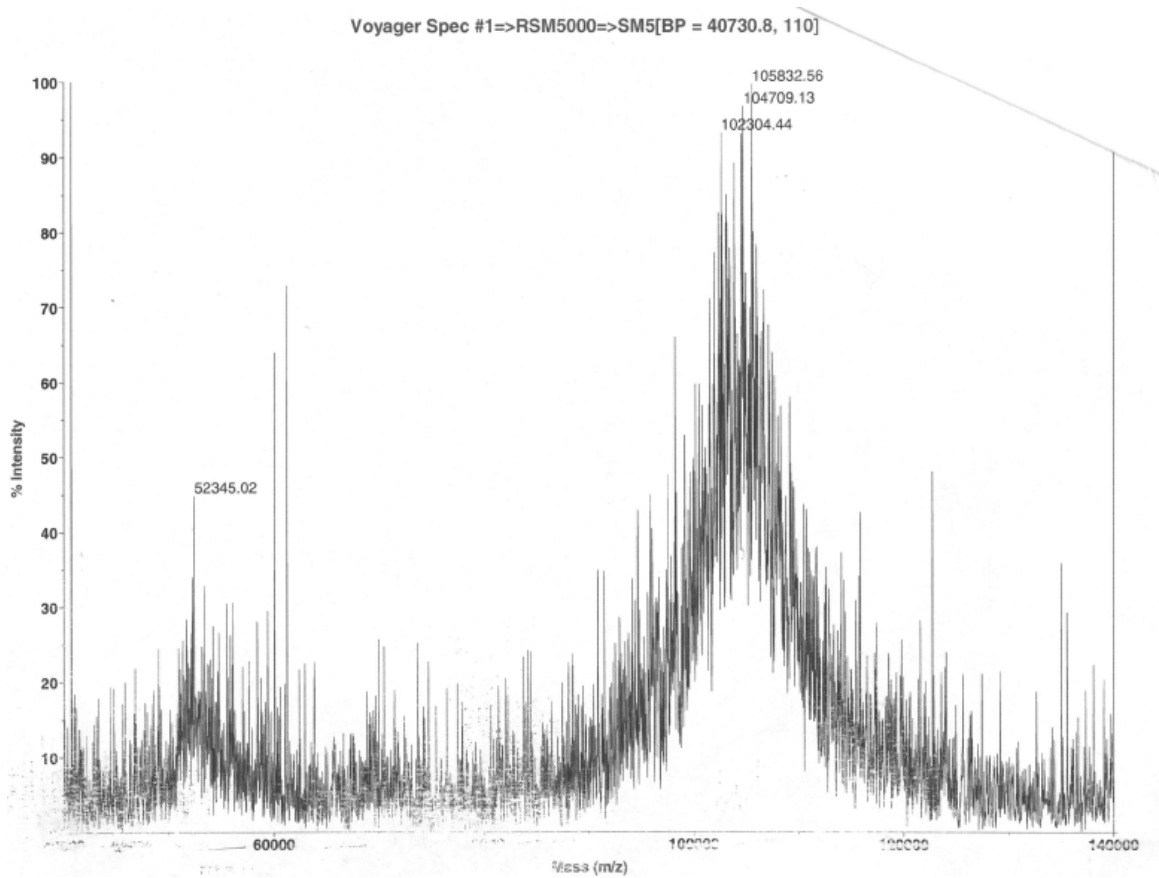

**Figure S4.** MALDI-TOF mass spectrum of compound **4**.

DOTA-DCT  
File: xp  
Pulse Sequence: s2pul  
Solvent: cdcl3  
Ambient temperature  
Operator: jdlia  
Mercury-300BB "mercury300"  
  
Relax. delay 1.000 sec  
Pulse 30.0 degrees  
Acq. time 1.995 sec  
Width 4500.5 Hz  
32 repetitions  
OBSERVE H1 299.9142799 MHz  
DATA PROCESSING  
FT size 32768  
Total time 1 min, 40 sec

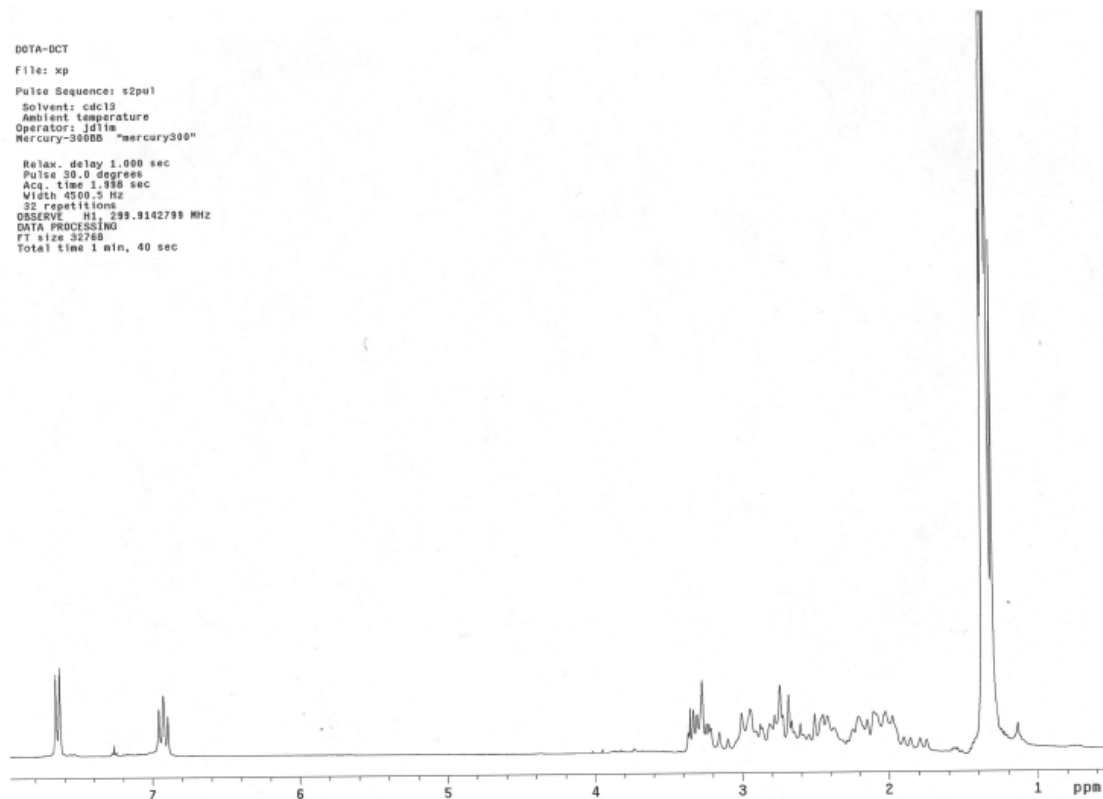

**Figure S5.**  $^1\text{H}$  NMR spectrum of compound **5** (300 MHz,  $\text{CDCl}_3$ ).

DOTA-DCT  
File: xp  
Pulse Sequence: s2pu1  
Solvent: cdcl3  
Ambient temperature  
Operator: jdlm  
Mercury-3000B "mercury300"  
  
Relax. delay 9.001 sec  
Pulse 60.0 degrees  
Acq. time 1.515 sec  
Width 15761.7 Hz  
1134 repetitions  
OBSERVE C13, 75.4135132 MHz  
DECOUPLE H1, 299.9157791 MHz  
Power 35 dB  
continuously on  
WALTZ-16 modulated  
DATA PROCESSING  
Line broadening 1.0 Hz  
FT size 131072  
Total time 58 hr, 41 min, 54 sec

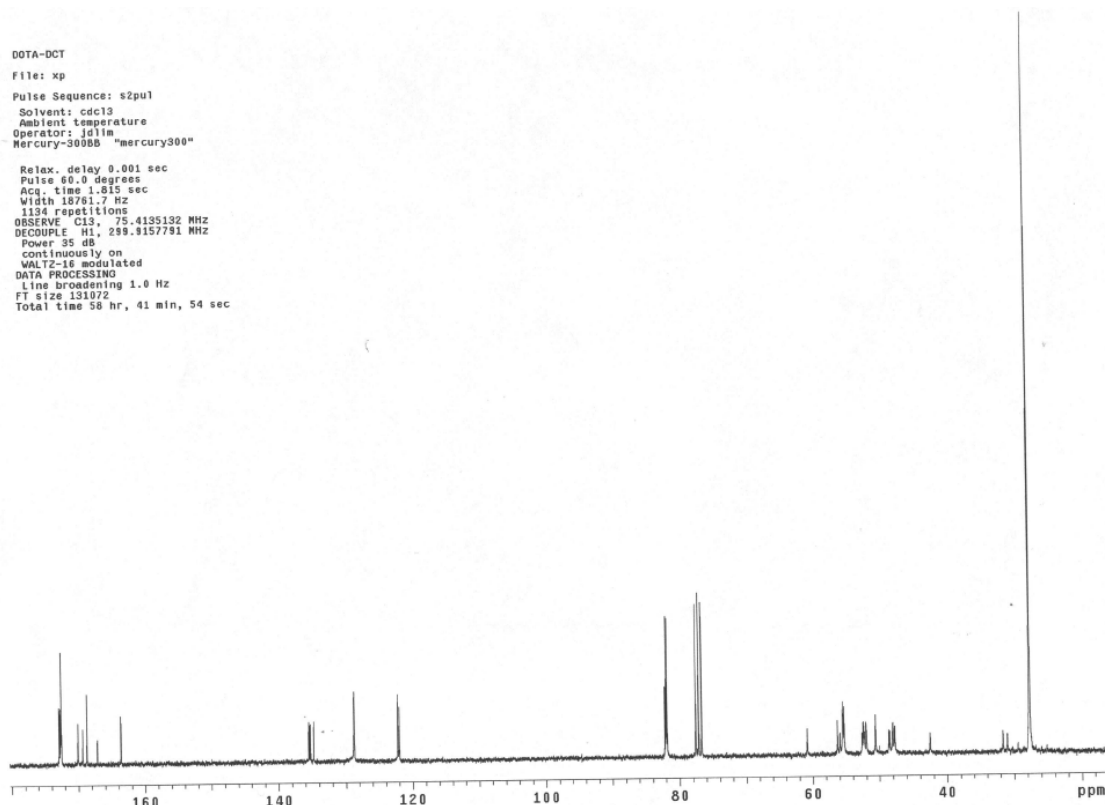

**Figure S6.**  $^{13}\text{C}$  NMR spectrum of compound **5** (75 MHz,  $\text{CDCl}_3$ ).

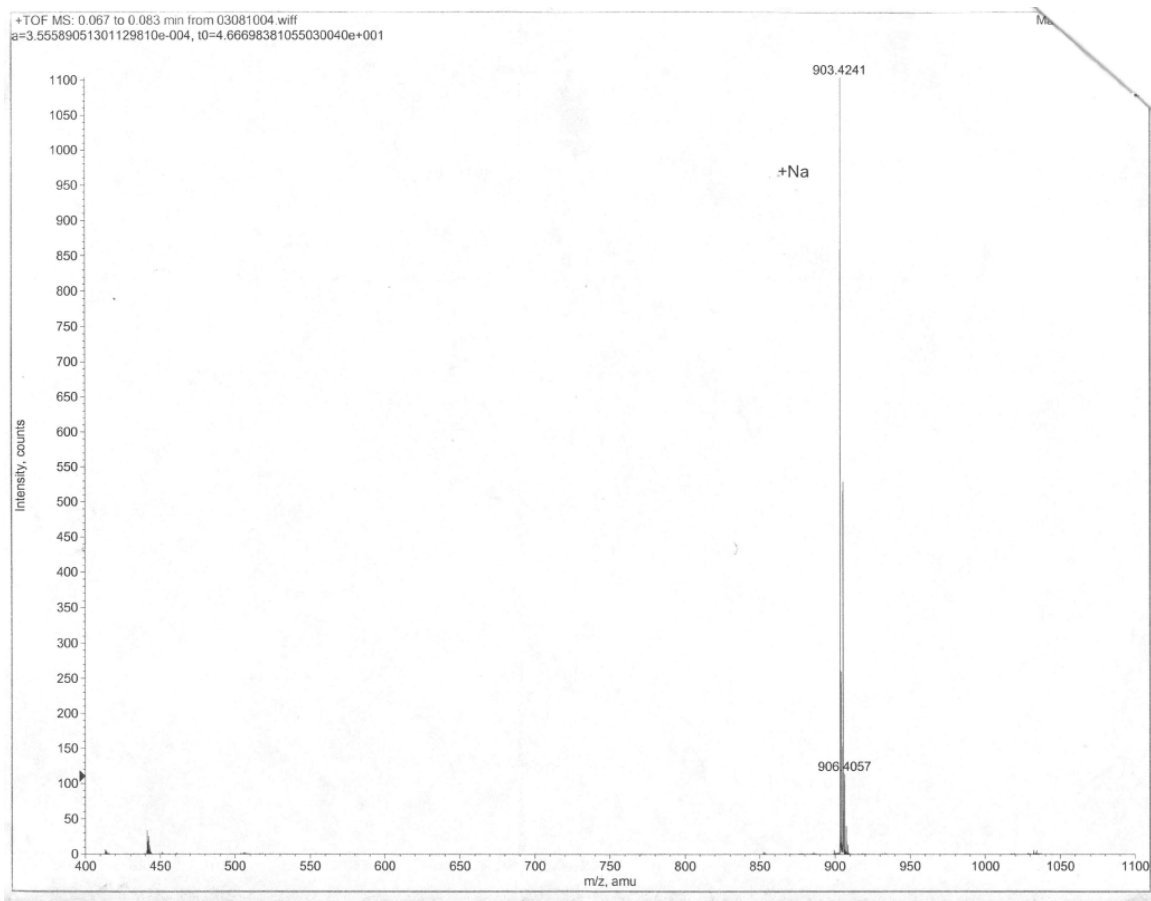

**Figure S7.** ESI-TOF mass spectrum of compound **5**.

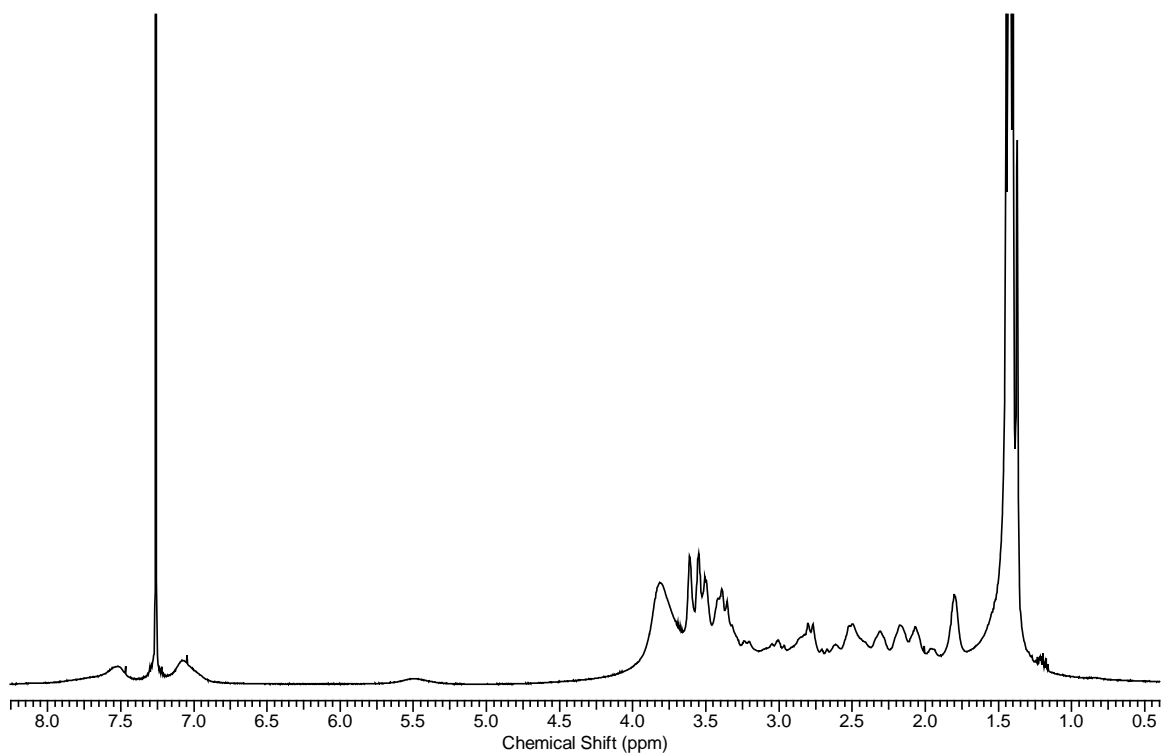

**Figure S8.** <sup>1</sup>H NMR spectrum of compound **6** (500 MHz, CDCl<sub>3</sub>).

03-DOTA-MGT  
File: xp  
Pulse Sequence: s2pu1  
Solvent: cdcl3  
Ambient temperature  
Operator: jdlie  
INOVA-300 "inova300"

Relax. delay 9.001 sec  
Pulse 63.0 degrees  
Acq. time 1.835 sec  
Width 16501.7 Hz  
26115 repetitions  
OBSERVE C13, 75.4244770 MHz  
DECOUPLE H1, 299.3594259 MHz  
Power 35 dB  
continuously on  
WALTZ-16 modulated  
DATA PROCESSING  
Line broadening 1.0 Hz  
FT size 65536  
Total time 59 hr, 41 min, 35 sec

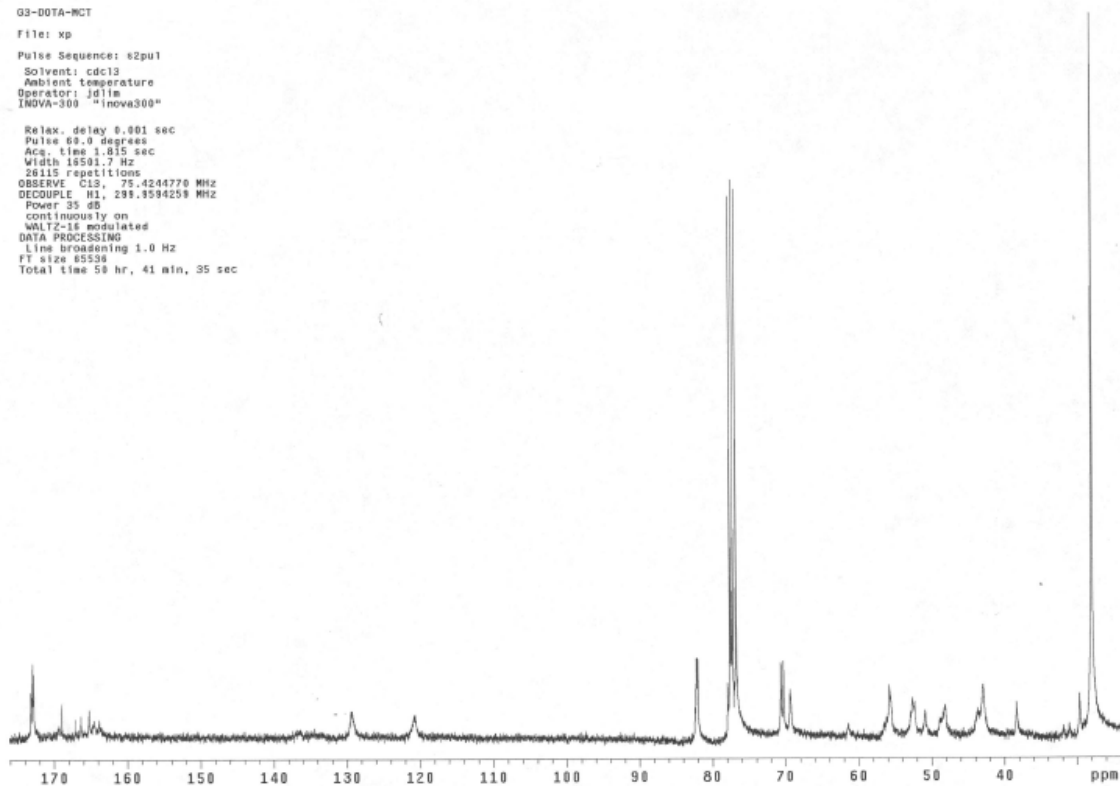

**Figure S9.**  $^{13}\text{C}$  NMR spectrum of compound **6** (75 MHz,  $\text{CDCl}_3$ ).

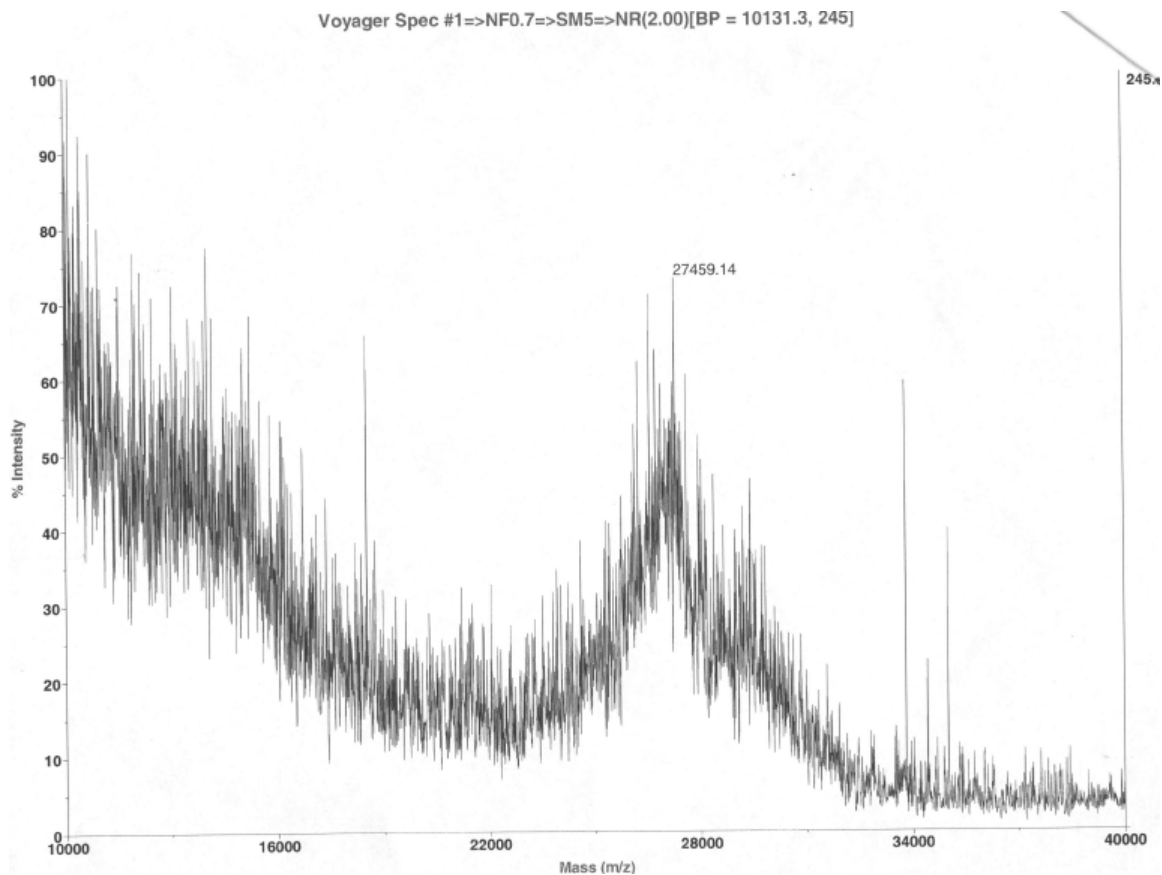

**Figure S10.** MALDI-TOF mass spectrum of compound **6**.



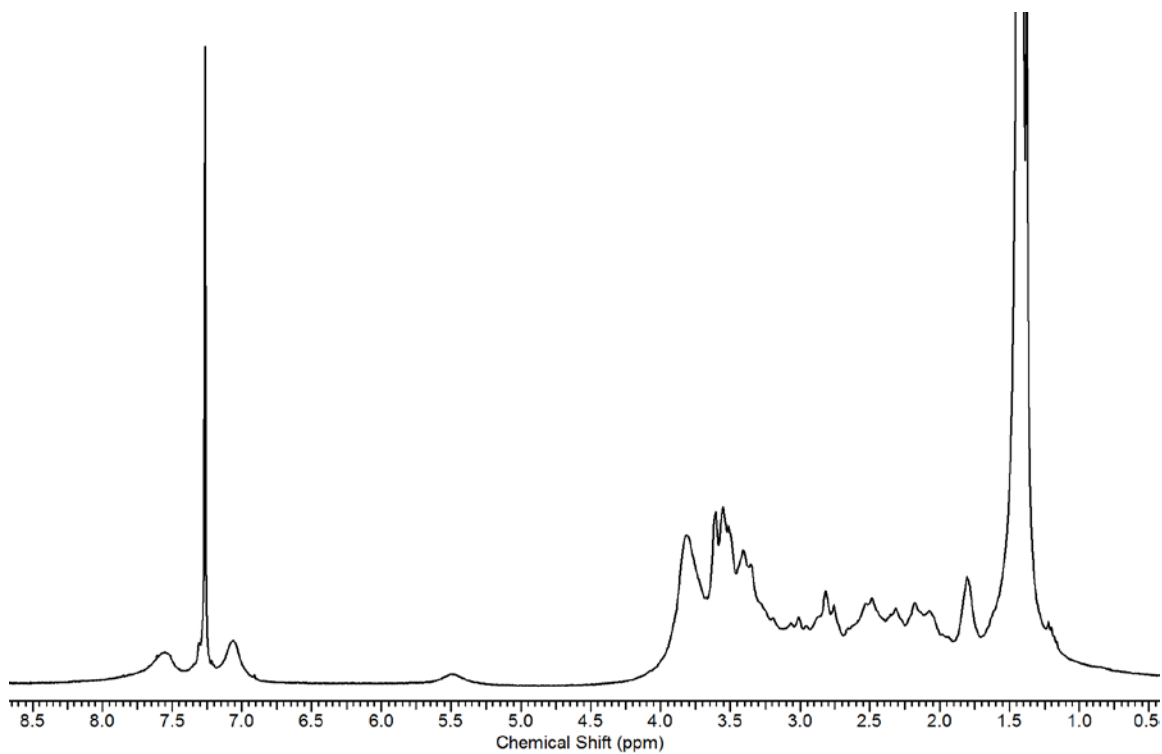

**Figure S11.**  $^1\text{H}$  NMR spectrum of compound **7** (300 MHz,  $\text{CDCl}_3$ ).

GS-DOTA-MCT  
Pulse Sequence: s2pul  
Solvent: CDCl3  
Ambient temperature  
Mercury-300BB "mercuryplus300"  
  
Pulse 42.2 degree  
Acq. time 1.815 sec  
Width 18761.7 Hz  
23825 repetitions  
OBSERVE C13, 75.4482158 MHz  
DECOUPLE H1, 300.0525807 MHz  
Power 35 dB  
continuously on  
WALTZ-16 modulated  
DATA PROCESSING  
Line broadening 1.0 Hz  
FT size 131072  
Total time 58 hr, 40 min, 36 sec

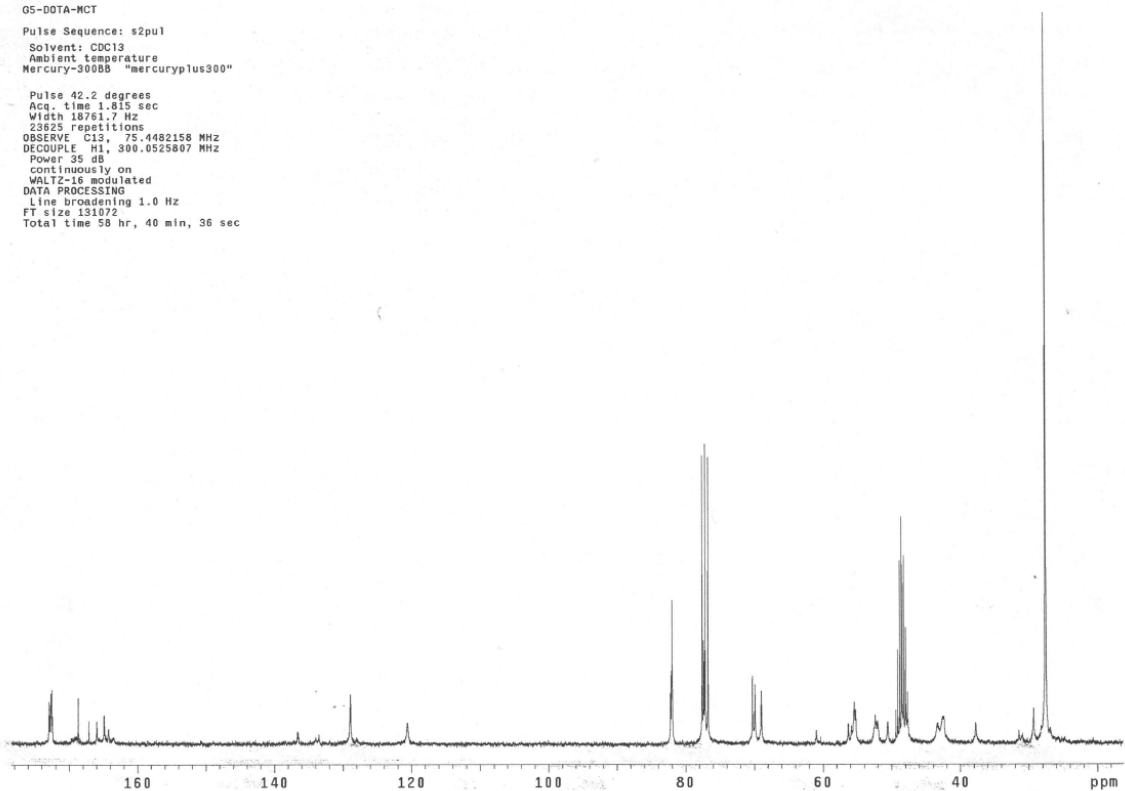

**Figure S12.**  $^{13}\text{C}$  NMR spectrum of compound **7** (75 MHz,  $\text{CDCl}_3/\text{MeOH-d}_4$ ).

DTPA-DCT  
File: xp  
Pulse Sequence: s2pul  
Solvent: cdcl3  
Ambient temperature  
Operator: jdlm  
Mercury-30000 "mercury300"

Relax. delay 1.000 sec  
Pulse 30.0 degrees  
Acq. time 1.938 sec  
Width 4500.5 Hz  
18 repetitions  
OBSERVE H1, 299.9142791 MHz  
DATA PROCESSING  
FT size 32768  
Total time 0 min, 50 sec

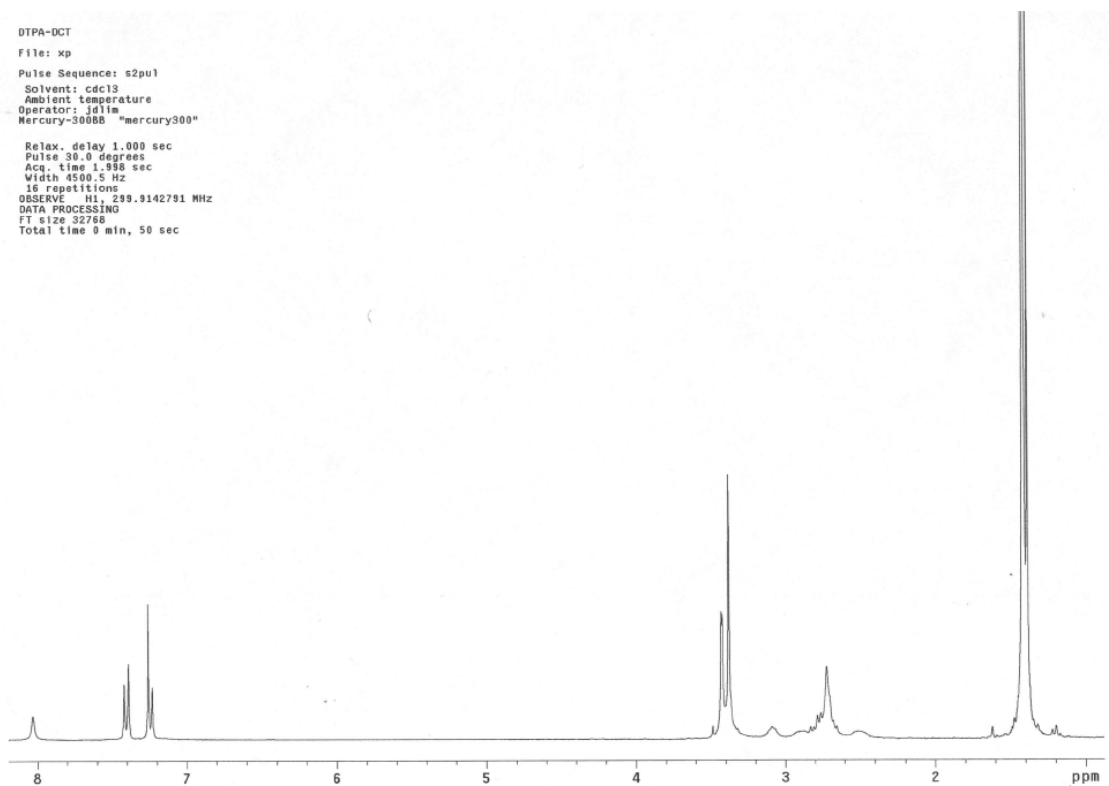

**Figure S13.**  $^1\text{H}$  NMR spectrum of compound **8** (300 MHz,  $\text{CDCl}_3$ ).

DTPA-DCT  
File: xp  
Pulse Sequence: s2pu1  
Solvent: cdcl3  
Ambient temperature  
Operator: jdlie  
Mercury-30000 "mercury300"  
  
Relax. delay 0.901 sec  
Pulse 00.0 degrees  
Acq. time 1.815 sec  
Width 18761.7 Hz  
1153 repetitions  
OBSERVE C13, 75.4134386 MHz  
DECOUPLE H1, 299.8157791 MHz  
Power 35 dB  
continuously on  
WALTZ-16 modulated  
DATA PROCESSING  
Line broadening 1.0 Hz  
FT size 131072  
Total time 56 hr, 41 min, 54 sec

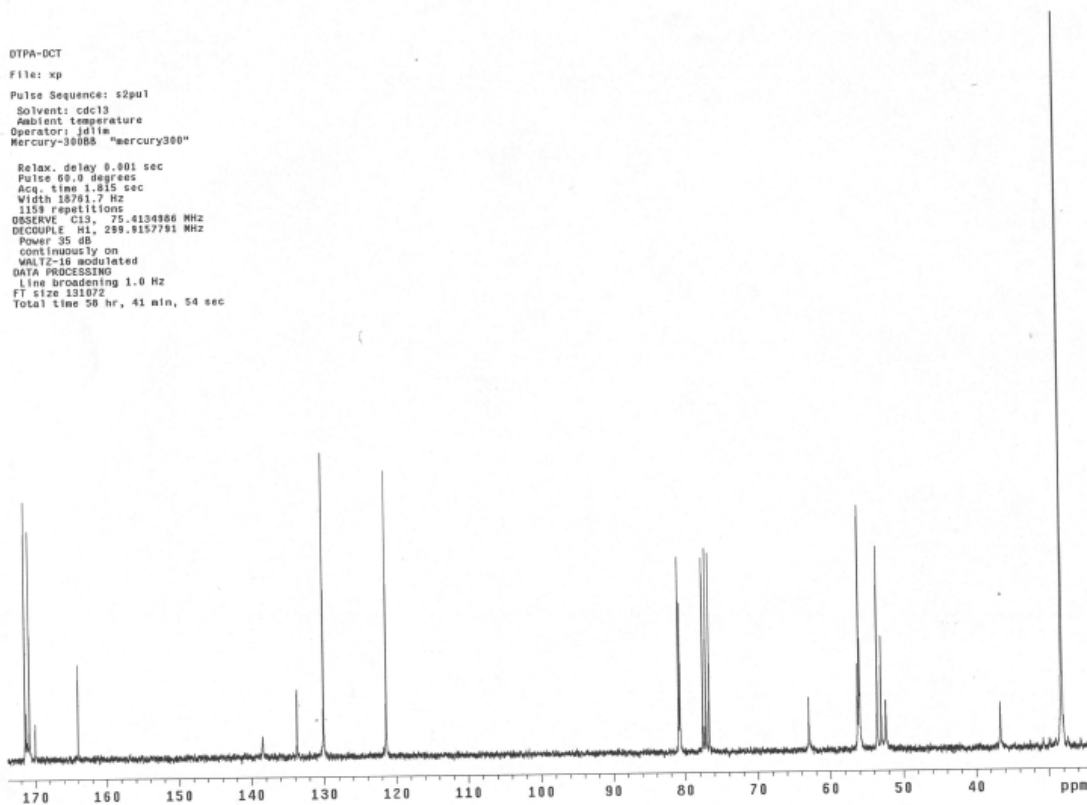

**Figure S14.**  $^{13}\text{C}$  NMR spectrum of compound **8** (75 MHz,  $\text{CDCl}_3$ ).

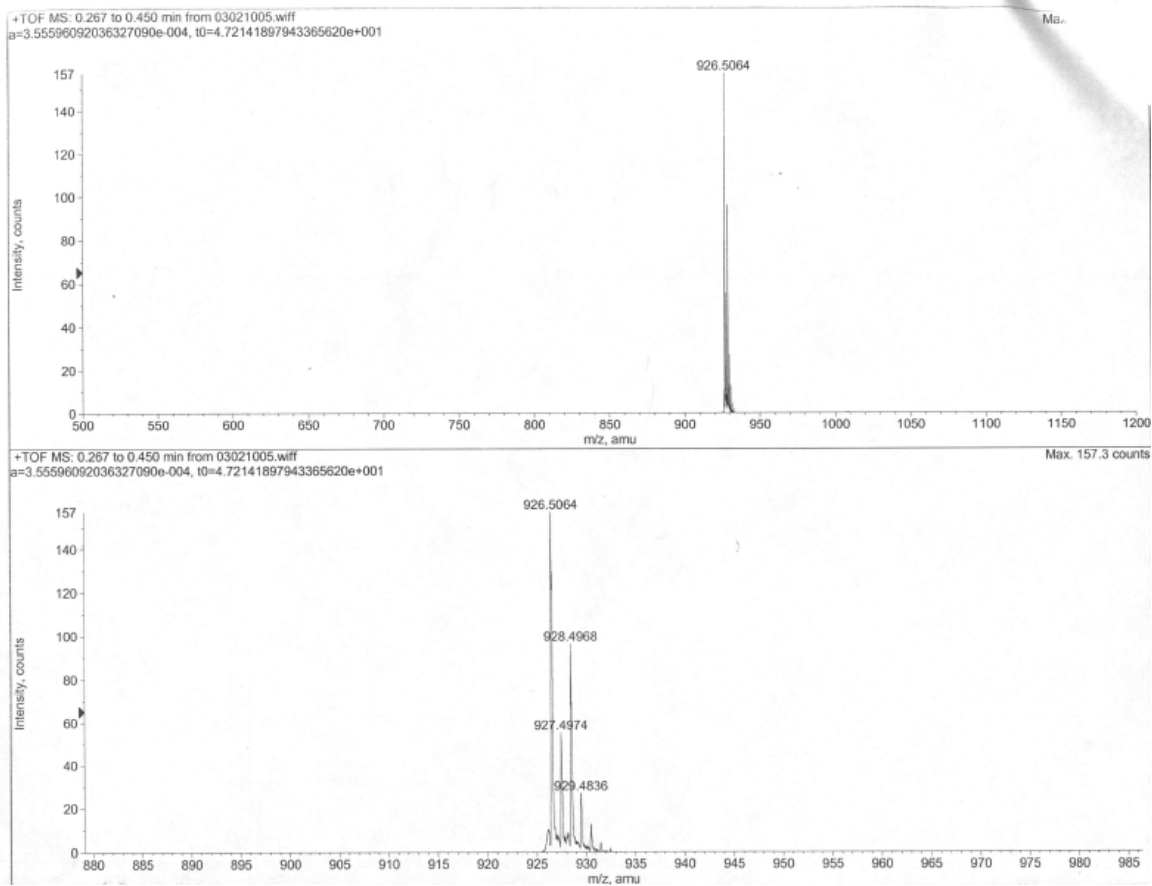

**Figure S15.** ESI-TOF mass spectrum of compound **8**.

G3-DTPA-MCT  
File: xp  
Pulse Sequence: s2pul  
Solvent: cdcl3  
Ambient temperature  
Operator: jdlia  
Mercury-3000B "mercury300"  
Relax. delay 1.000 sec  
Pulse 30.0 degree  
Acq. time 1.916 sec  
Width 4500.5 Hz  
32 repetitions  
OBSERVE H1, 299.9142794 MHz  
DATA PROCESSING  
FT size 32768  
Total time 1 min, 40 sec

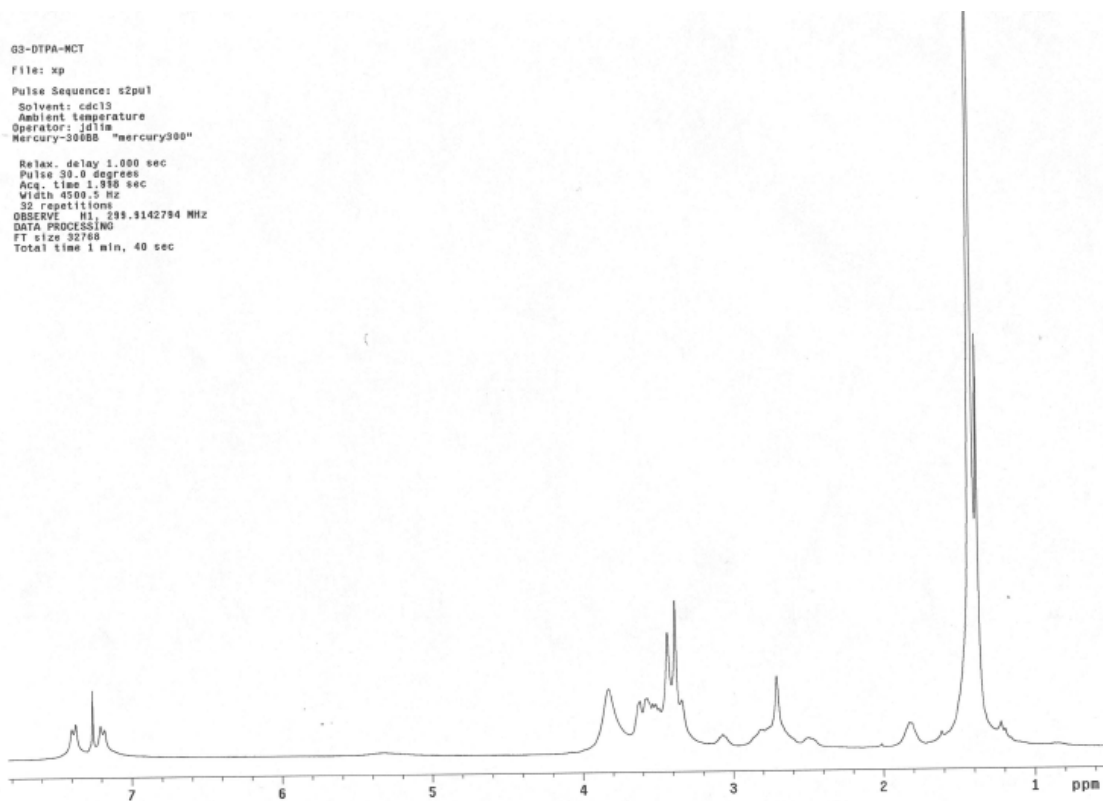

**Figure S16.** <sup>1</sup>H NMR spectrum of compound **9** (300 MHz, CDCl<sub>3</sub>).

G3-DTPA-NCT  
File: xp  
Pulse Sequence: s2pu1  
Solvent: cdcl3  
Ambient temperature  
Operator: jdlm  
Mercury-300B "mercury300"  
Relax. delay 0.001 sec  
Pulse 60.0 degrees  
Acq. time 1.815 sec  
Width 18761.7 Hz  
1635 repetitions  
OBSERVE C13, 75.4135000 MHz  
DECOUPLE H1, 298.9157791 MHz  
Power 35 dB  
continuously on  
WALTZ-16 modulated  
DATA PROCESSING  
Line broadening 1.0 Hz  
F1 size 131072  
Total time 5 hr, 52 min, 13 sec

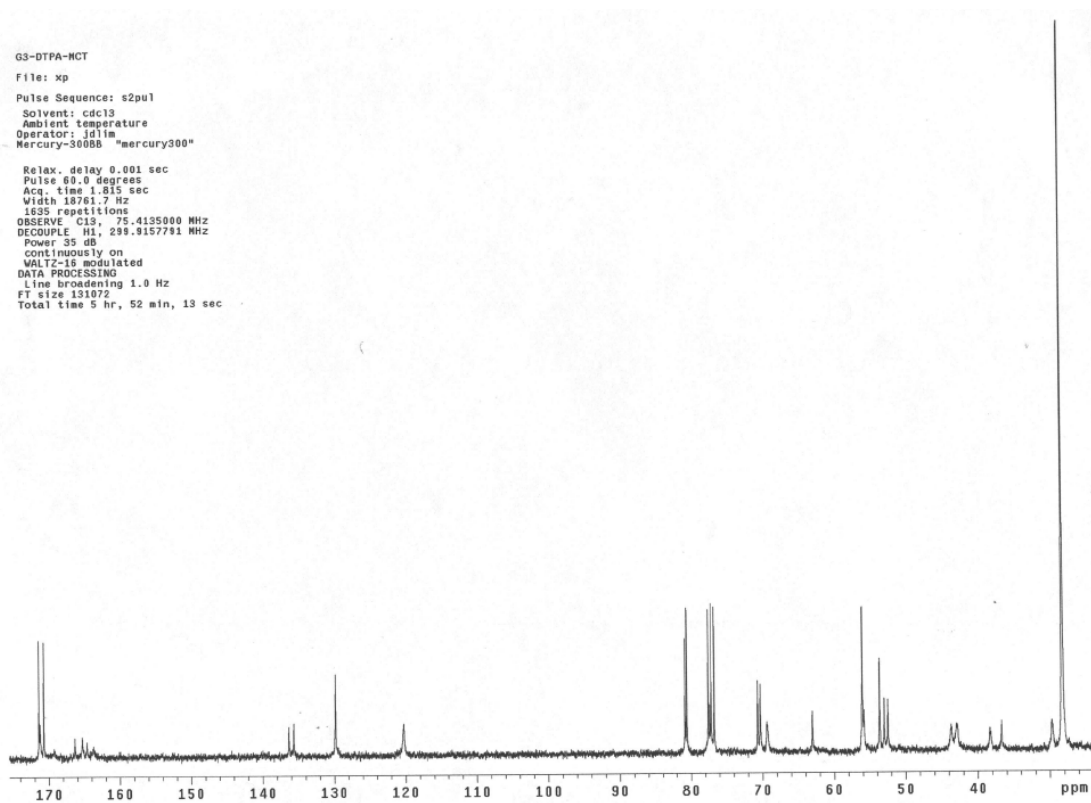

**Figure S17.**  $^{13}\text{C}$  NMR spectrum of compound **9** (75 MHz,  $\text{CDCl}_3$ ).

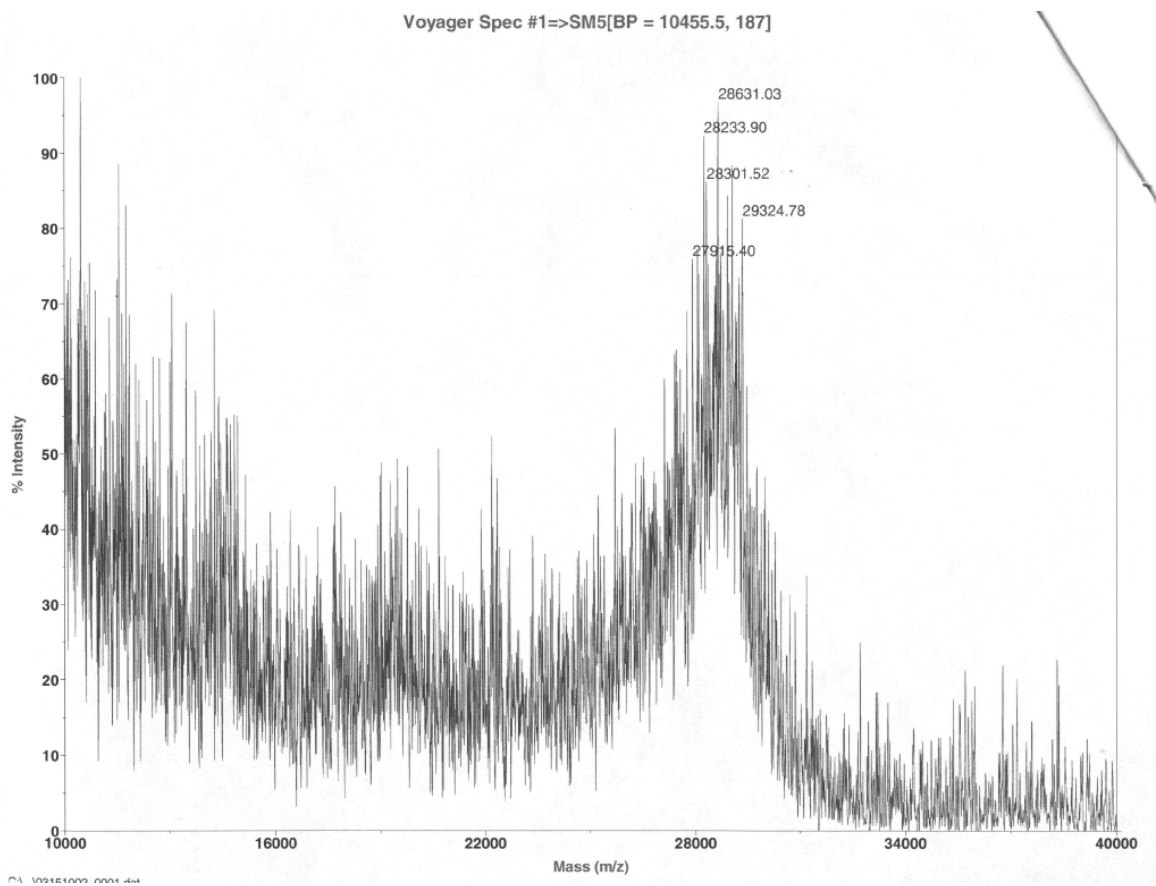

**Figure S18.** MALDI-TOF mass spectrum of compound **9**.



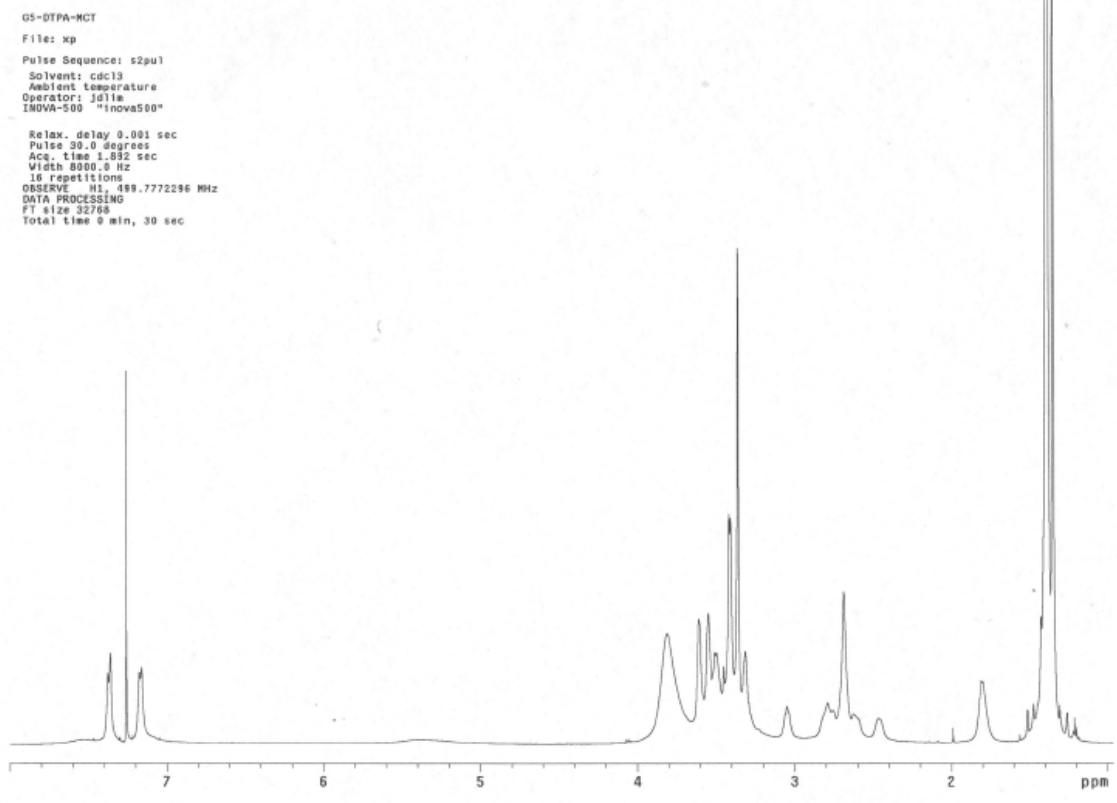

**Figure S19.**  $^1\text{H}$  NMR spectrum of compound **10** (500 MHz,  $\text{CDCl}_3$ ).

05-DTPA-NCT

File: xp

Pulse Sequence: s2pu1

Solvent: cdcl3

Ambient Temperature

Operator: jdl1m

INOVA-500 "inova500"

Relax. delay 0.001 sec

Pulse 60.0 degrees

Acq. time 1.300 sec

Width 25000.0 Hz

2313 repetitions

OBSERVE C13, 125.6699807 MHz

DECOUPLE H1, 499.7797227 MHz

Power 43 dB

continuously on

WALTZ-16 modulated

DATA PROCESSING

Line broadening 0.5 Hz

FT size 65536

Total time 36 hr, 23 min, 59 sec

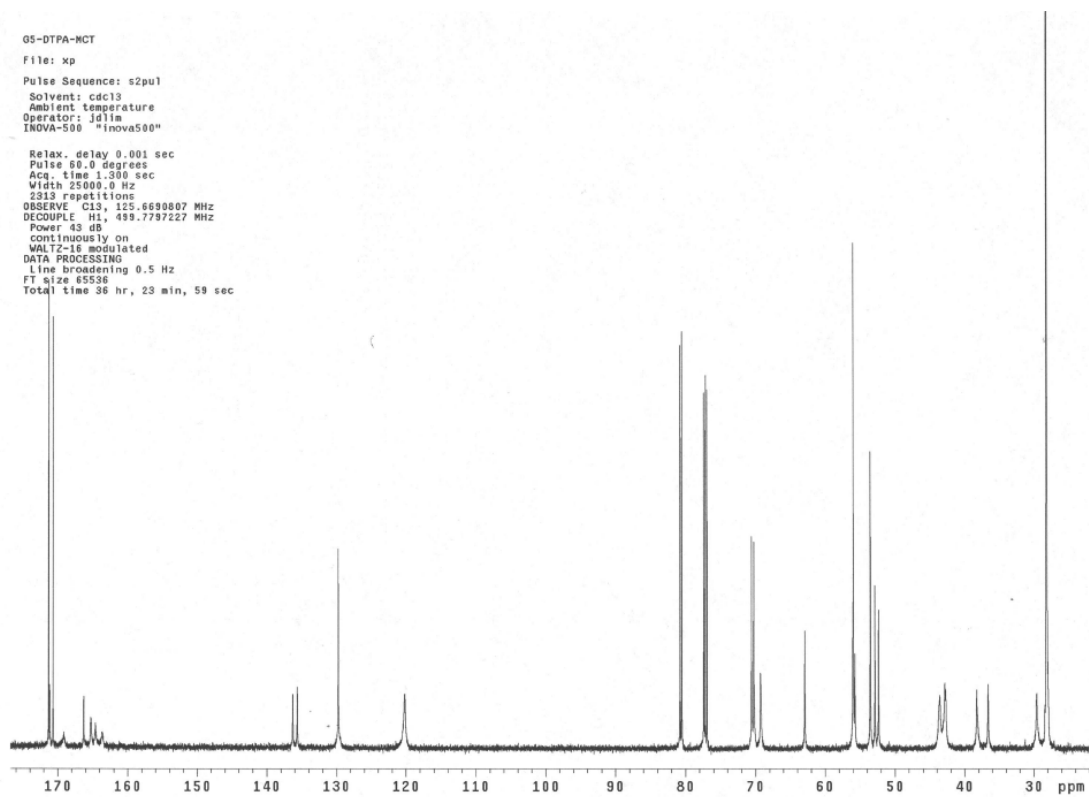

**Figure S20.**  $^{13}\text{C}$  NMR spectrum of compound **10** (125 MHz,  $\text{CDCl}_3$ ).

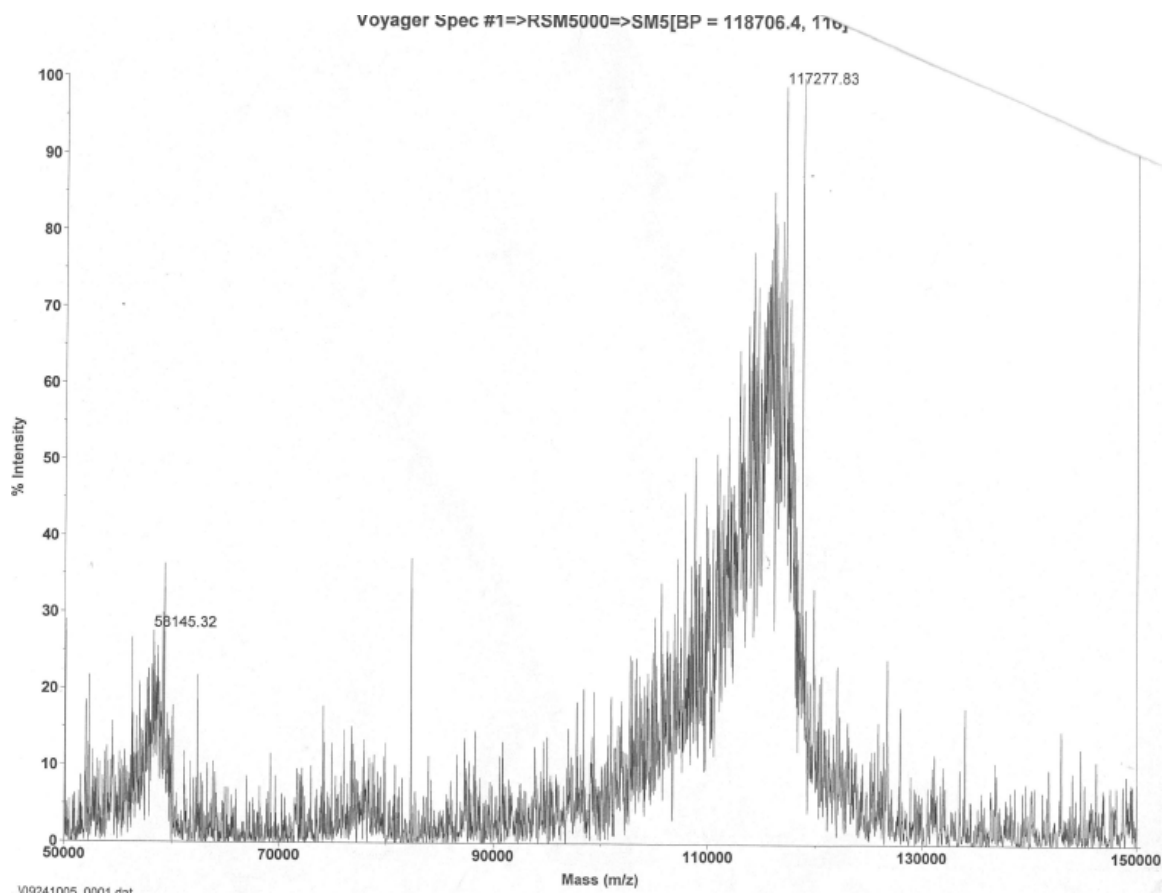

**Figure S21.** MALDI-TOF mass spectrum of compound **10**.

## PAMAM-G5-DPTA (2min/frame)

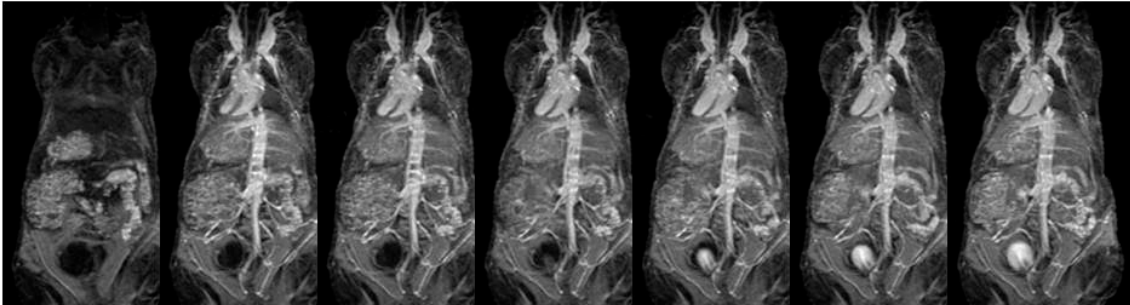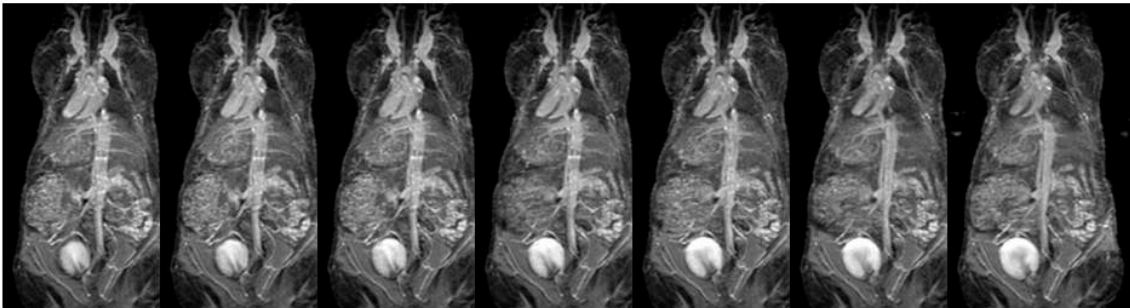

## PAMAM-G5-DOTA (2min/frame)

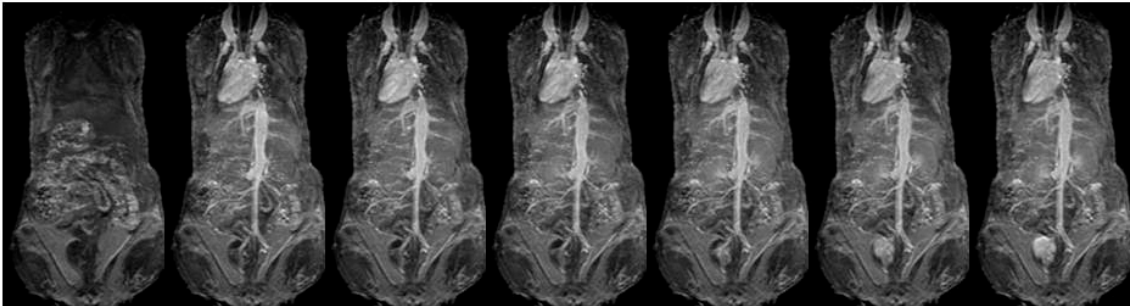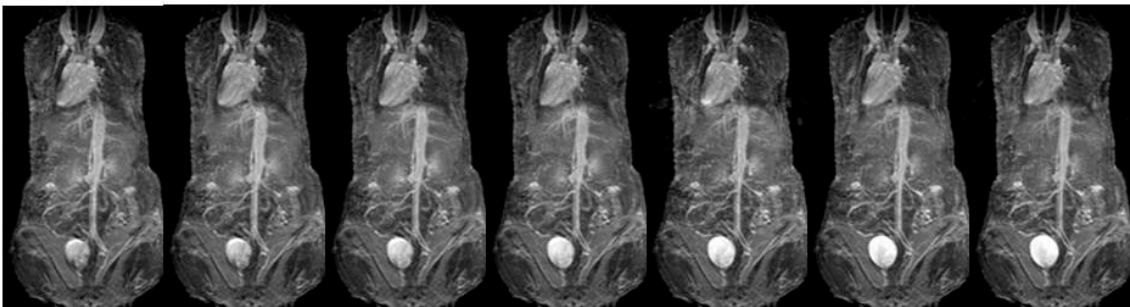

**Figure S22.** Dynamic MRI of mice using 0.03mmolGd/kg of PAMAM-G5-DPTA and PAMAM-G5-DOTA. No clear difference on relaxivity is shown between DPTA and DOTA conjugates.
